# Supplementary material
Source: PubMed Central journal article supplement (PMC6659121)

A

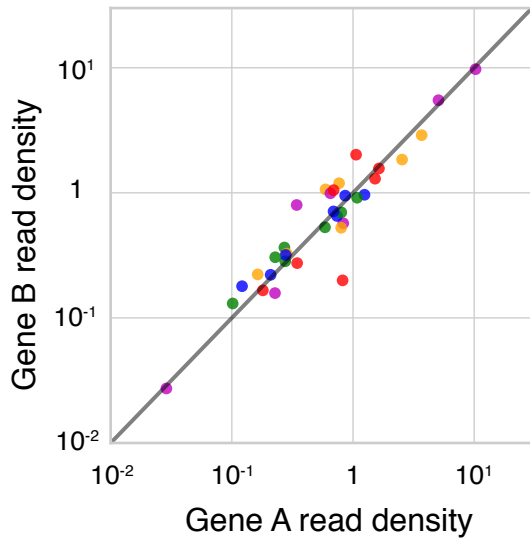

B

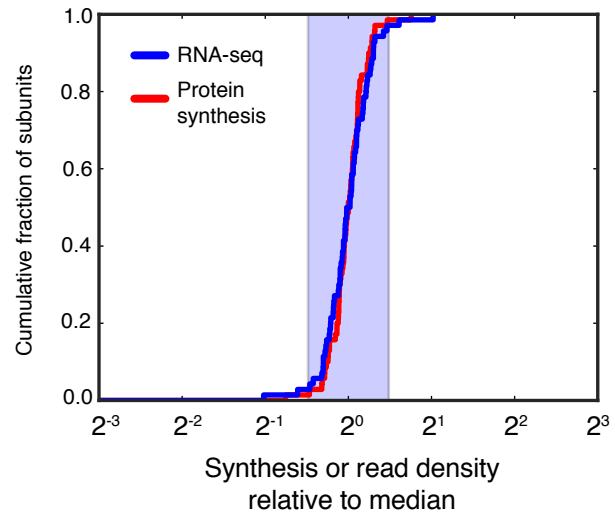

C

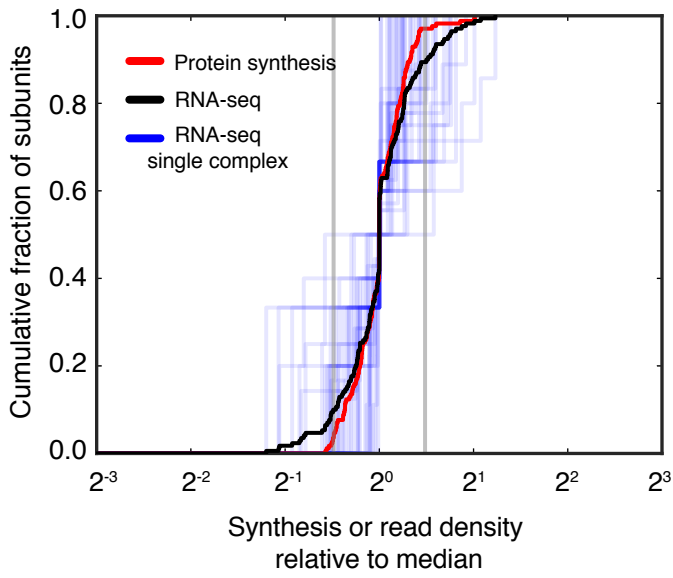

D

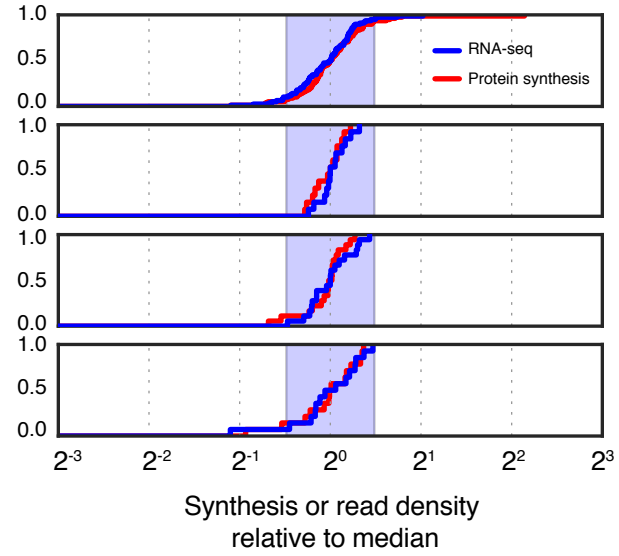

Supplement: NIHMS1039967-supplement-Figure_s5.pdf [file NIHMS1039967-supplement-Figure_s5.pdf]
